# Supplementary material for: Local community environments drive India's obesity epidemic: multilevel evidence using Asian-specific BMI criteria
Source: Research Square preprint supplement (doi:10.21203/rs.3.rs-6662510/v1), 2025-06-14
Supplement: Supplementary file 1 [file 83e6a90ffebfdc32381d55e9.docx]

| Table S1. Proportion of total variation in overweight, obesity, and overweight/obesity among female attributable to cluster and district levels from state-specific models in India, NFHS 2019–21 | | | | | | | | | | | | |
| --- | --- | --- | --- | --- | --- | --- | --- | --- | --- | --- | --- | --- |
| **States** | **Overweight** | | | | **Obesity** | | | | **Overweight/Obesity** | | | |
| Null model, VPC (%) | | Full model, VPC (%) | | Null model, VPC (%) | | Full model, VPC (%) | | Null model, VPC (%) | | Full model, VPC (%) | |
| District | PSU | District | PSU | District | PSU | District | PSU | District | PSU | District | PSU |
| Andhra Pradesh | 7.86 | 92.14 | 14.36 | 85.64 | 24.96 | 75.04 | 34.04 | 65.96 | 23.15 | 76.85 | 30.57 | 69.43 |
| Arunachal Pradesh | 18.77 | 81.23 | 17.94 | 82.06 | 23.44 | 76.56 | 16.76 | 83.24 | 33.88 | 66.12 | 26.21 | 73.79 |
| Assam | 11.01 | 88.99 | 12.10 | 87.90 | 15.25 | 84.75 | 15.09 | 84.91 | 14.17 | 85.83 | 14.23 | 85.77 |
| Bihar | 16.63 | 83.37 | 10.28 | 89.72 | 23.02 | 76.98 | 29.10 | 70.90 | 21.16 | 78.84 | 21.46 | 78.54 |
| Chhattisgarh | 38.82 | 61.18 | 24.07 | 75.93 | 28.29 | 71.71 | 26.07 | 73.93 | 33.05 | 66.95 | 20.70 | 79.30 |
| Gujarat | 21.28 | 78.72 | 4.02 | 95.98 | 42.19 | 57.81 | 29.26 | 70.74 | 39.80 | 60.20 | 26.99 | 73.01 |
| Haryana | 22.33 | 77.67 | 21.63 | 78.37 | 45.36 | 54.64 | 36.03 | 63.97 | 40.61 | 59.39 | 22.14 | 77.86 |
| Himachal Pradesh | 0.00 | 100.00 | 0.00 | 100.00 | 18.79 | 81.21 | 15.52 | 84.48 | 13.18 | 86.82 | 11.00 | 89.00 |
| Jammu & Kashmir | 16.58 | 83.42 | 15.16 | 84.84 | 19.50 | 80.50 | 14.71 | 85.29 | 18.30 | 81.70 | 12.74 | 87.26 |
| Jharkhand | 11.75 | 88.25 | 2.77 | 97.23 | 20.09 | 79.91 | 20.87 | 79.13 | 14.98 | 85.02 | 6.16 | 93.84 |
| Karnataka | 6.64 | 93.36 | 2.85 | 97.15 | 24.09 | 75.91 | 20.54 | 79.46 | 25.64 | 74.36 | 21.04 | 78.96 |
| Kerala | 18.83 | 81.17 | 20.35 | 79.65 | 34.69 | 65.31 | 30.27 | 69.73 | 35.40 | 64.60 | 20.98 | 79.02 |
| Madhya Pradesh | 5.69 | 94.31 | 5.54 | 94.46 | 21.23 | 78.77 | 30.35 | 69.65 | 15.76 | 84.24 | 20.00 | 80.00 |
| Maharashtra | 7.49 | 92.51 | 3.91 | 96.09 | 39.07 | 60.93 | 41.12 | 58.88 | 30.97 | 69.03 | 30.92 | 69.08 |
| Manipur | 22.47 | 77.53 | 23.43 | 76.57 | 43.14 | 56.86 | 30.92 | 69.08 | 31.06 | 68.94 | 15.13 | 84.87 |
| Meghalaya | 4.01 | 95.99 | 2.46 | 97.54 | 19.45 | 80.55 | 23.77 | 76.23 | 6.00 | 94.00 | 7.78 | 92.22 |
| Mizoram | 0.00 | 100.00 | 0.00 | 100.00 | 14.00 | 86.00 | 2.04 | 97.96 | 12.79 | 87.21 | 5.58 | 94.42 |
| Nagaland | 26.72 | 73.28 | 27.40 | 72.60 | 18.24 | 81.76 | 13.82 | 86.18 | 20.70 | 79.30 | 17.24 | 82.76 |
| NCT of Delhi | 98.07 | 1.93 | 100.00 | 0.00 | 7.34 | 92.66 | 15.35 | 84.65 | 0.00 | 100.00 | 4.31 | 95.69 |
| Odisha | 41.54 | 58.46 | 21.40 | 78.60 | 39.41 | 60.59 | 39.20 | 60.80 | 40.60 | 59.40 | 36.99 | 63.01 |
| Punjab | 20.90 | 79.10 | 25.50 | 74.50 | 32.57 | 67.43 | 20.57 | 79.43 | 33.08 | 66.92 | 22.53 | 77.47 |
| Rajasthan | 12.49 | 87.51 | 7.56 | 92.44 | 36.85 | 63.15 | 33.38 | 66.62 | 27.46 | 72.54 | 18.10 | 81.90 |
| Tamil Nadu | 2.88 | 97.12 | 3.41 | 96.59 | 18.70 | 81.30 | 7.78 | 92.22 | 16.08 | 83.92 | 4.44 | 95.56 |
| Telangana | 42.34 | 57.66 | 25.73 | 74.27 | 37.23 | 62.77 | 25.72 | 74.28 | 42.70 | 57.30 | 28.19 | 71.81 |
| Tripura | 25.33 | 74.67 | 19.90 | 80.10 | 11.14 | 88.86 | 23.83 | 76.17 | 16.77 | 83.23 | 17.35 | 82.65 |
| Uttar Pradesh | 22.06 | 77.94 | 16.71 | 83.29 | 39.01 | 60.99 | 33.47 | 66.53 | 38.53 | 61.47 | 30.51 | 69.49 |
| Uttarakhand | 3.88 | 96.12 | 4.17 | 95.83 | 26.83 | 73.17 | 24.59 | 75.41 | 19.81 | 80.19 | 13.27 | 86.73 |
| West Bengal | 18.56 | 81.44 | 9.67 | 90.33 | 27.29 | 72.71 | 23.39 | 76.61 | 28.78 | 71.22 | 22.25 | 77.75 |
| Note: VPC – variance partitioning coefficient and full models are adjusted for age, education, wealth quintile, and place of residence | | | | | | | | | | | | |

| Table S2. Proportion of total variation in overweight, obesity, and overweight/obesity among male, attributable to cluster and district levels from state-specific models in India, NFHS 2019–21 | | | | | | | | | | | | |
| --- | --- | --- | --- | --- | --- | --- | --- | --- | --- | --- | --- | --- |
| **States** | Overweight | | | | Obesity | | | | Overweight/ Obesity | | | |
| **Null model, VPC (%)** | | **Full model, VPC (%)** | | **Null model, VPC (%)** | | **Full model, VPC (%)** | | **Null model, VPC (%)** | | **Full model, VPC (%)** | |
| District | PSU | District | PSU | District | PSU | District | PSU | District | PSU | District | PSU |
| Andhra Pradesh | 23.96 | 76.04 | 60.08 | 39.92 | 0.00 | 100.00 | 0.00 | 100.00 | 10.84 | 89.16 | 21.29 | 78.71 |
| Arunachal Pradesh | 93.16 | 6.84 | 100.00 | 0.00 | 29.10 | 70.90 | 20.22 | 79.78 | 31.35 | 68.65 | 24.66 | 75.34 |
| Assam | 12.41 | 87.59 | 13.09 | 86.91 | 15.81 | 84.19 | 25.01 | 74.99 | 17.33 | 82.67 | 22.27 | 77.73 |
| Bihar | 10.96 | 89.04 | 5.04 | 94.96 | 16.80 | 83.20 | 15.45 | 84.55 | 22.38 | 77.62 | 11.02 | 88.98 |
| Chhattisgarh | 26.66 | 73.34 | 13.35 | 86.65 | 9.73 | 90.27 | 6.40 | 93.60 | 22.04 | 77.96 | 12.16 | 87.84 |
| Gujarat | 15.90 | 84.10 | 3.32 | 96.68 | 25.96 | 74.04 | 20.48 | 79.52 | 25.31 | 74.69 | 18.78 | 81.22 |
| Haryana | 0.00 | 100.00 | 1.22 | 98.78 | 23.01 | 76.99 | 23.59 | 76.41 | 11.05 | 88.95 | 10.36 | 89.64 |
| Himachal Pradesh | 0.00 | 100.00 | 0.00 | 100.00 | 19.03 | 80.97 | 23.82 | 76.18 | 22.53 | 77.47 | 21.65 | 78.35 |
| Jammu & Kashmir | 0.00 | 100.00 | 0.02 | 99.98 | 21.00 | 79.00 | 12.65 | 87.35 | 12.92 | 87.08 | 6.31 | 93.69 |
| Jharkhand | 37.59 | 62.41 | 52.48 | 47.52 | 16.83 | 83.17 | 13.80 | 86.20 | 26.48 | 73.52 | 32.13 | 67.87 |
| Karnataka | 8.63 | 91.37 | 0.00 | 100.00 | 6.66 | 93.34 | 1.22 | 98.78 | 15.14 | 84.86 | 7.69 | 92.31 |
| Kerala | 24.80 | 75.20 | 20.36 | 79.64 | 1.87 | 98.13 | 0.09 | 99.91 | 44.69 | 55.31 | 0.00 | 100.00 |
| Madhya Pradesh | 29.20 | 70.80 | 31.96 | 68.04 | 17.06 | 82.94 | 11.98 | 88.02 | 16.46 | 83.54 | 14.45 | 85.55 |
| Maharashtra | 0.00 | 100.00 | 0.00 | 100.00 | 14.44 | 85.56 | 13.47 | 86.53 | 8.01 | 91.99 | 6.92 | 93.08 |
| Manipur | 16.43 | 83.57 | 11.38 | 88.62 | 1.35 | 98.65 | 4.69 | 95.31 | 16.08 | 83.92 | 18.49 | 81.51 |
| Meghalaya | 11.22 | 88.78 | 0.72 | 99.28 | 21.69 | 78.31 | 9.16 | 90.84 | 10.24 | 89.76 | 0.91 | 99.09 |
| Mizoram | 21.94 | 78.06 | 28.08 | 71.92 | 0.00 | 100.00 | 0.00 | 100.00 | 0.08 | 99.92 | 2.35 | 97.65 |
| Nagaland | 49.98 | 50.02 | 62.86 | 37.14 | 23.99 | 76.01 | 21.92 | 78.08 | 42.15 | 57.85 | 39.03 | 60.97 |
| NCT of Delhi | 0.00 | 100.00 | 0.00 | 100.00 | 18.74 | 81.26 | 0.00 | 100.00 | 20.44 | 79.56 | 13.01 | 86.99 |
| Odisha | 0.52 | 99.48 | 0.00 | 100.00 | 27.42 | 72.58 | 0.00 | 100.00 | 25.17 | 74.83 | 0.00 | 100.00 |
| Punjab | 49.09 | 50.91 | 29.44 | 70.56 | 13.54 | 86.46 | 7.58 | 92.42 | 17.45 | 82.55 | 5.91 | 94.09 |
| Rajasthan | 17.23 | 82.77 | 19.00 | 81.00 | 4.43 | 95.57 | 0.00 | 100.00 | 10.29 | 89.71 | 8.46 | 91.54 |
| Tamil Nadu | 30.58 | 69.42 | 12.83 | 87.17 | 6.12 | 93.88 | 2.28 | 97.72 | 6.23 | 93.77 | 0.00 | 100.00 |
| Telangana | 18.56 | 81.44 | 0.00 | 100.00 | 32.61 | 67.39 | 14.28 | 85.72 | 35.85 | 64.15 | 17.14 | 82.86 |
| Tripura | 0.00 | 100.00 | 0.00 | 100.00 | 27.90 | 72.10 | 24.16 | 75.84 | 13.91 | 86.09 | 10.82 | 89.18 |
| Uttar Pradesh | 11.46 | 88.54 | 3.67 | 96.33 | 22.33 | 77.67 | 16.20 | 83.80 | 19.31 | 80.69 | 11.71 | 88.29 |
| Uttarakhand | 11.08 | 88.92 | 9.92 | 90.08 | 18.04 | 81.96 | 7.76 | 92.24 | 12.48 | 87.52 | 6.10 | 93.90 |
| West Bengal | 17.24 | 82.76 | 16.71 | 83.29 | 12.26 | 87.74 | 11.07 | 88.93 | 15.04 | 84.96 | 8.98 | 91.02 |
| Note: VPC – variance partitioning coefficient and full models are adjusted for age, education, wealth quintile, and place of residence | | | | | | | | | | | | |

| Table S3. Variance explained by the Full models at District and PSU levels for the overweight, obesity, and overweight/ obesity use among women (15-49) by states of India, NFHS 2019–21 | | | | | | | |
| --- | --- | --- | --- | --- | --- | --- | --- |
| **States** | **Overweight** | | **Obesity** | | **Overweight/ Obesity** | |
| District | PSU | District | PSU | District | PSU |
| Andhra Pradesh | -82.64 | 7.05 | -36.36 | 12.10 | -32.06 | 9.66 |
| Arunachal Pradesh | 4.42 | -1.02 | 28.50 | -8.73 | 22.65 | -11.60 |
| Assam | -9.90 | 1.23 | 1.01 | -0.18 | -0.44 | 0.07 |
| Bihar | 38.21 | -7.62 | -26.39 | 7.89 | -1.41 | 0.38 |
| Chhattisgarh | 37.99 | -24.10 | 7.85 | -3.10 | 37.35 | -18.44 |
| Gujarat | 81.10 | -21.92 | 30.66 | -22.38 | 32.19 | -21.29 |
| Haryana | 3.13 | -0.90 | 20.56 | -17.07 | 45.49 | -31.11 |
| Himachal Pradesh | 90.18 | 0.00 | 17.39 | -4.03 | 16.53 | -2.51 |
| Jammu & Kashmir | 8.54 | -1.70 | 24.54 | -5.94 | 30.41 | -6.81 |
| Jharkhand | 76.42 | -10.18 | -3.89 | 0.98 | 58.89 | -10.38 |
| Karnataka | 57.02 | -4.05 | 14.74 | -4.68 | 17.93 | -6.18 |
| Kerala | -8.07 | 1.87 | 12.74 | -6.77 | 40.74 | -22.33 |
| Madhya Pradesh | 2.71 | -0.16 | -42.94 | 11.58 | -26.85 | 5.03 |
| Maharashtra | 47.78 | -3.87 | -5.23 | 3.35 | 0.16 | -0.07 |
| Manipur | -4.27 | 1.24 | 28.34 | -21.50 | 51.30 | -23.12 |
| Meghalaya | 38.54 | -1.61 | -22.20 | 5.36 | -29.69 | 1.90 |
| Mizoram | 97.01 | 0.00 | 85.42 | -13.90 | 56.40 | -8.27 |
| Nagaland | -2.55 | 0.93 | 24.20 | -5.40 | 16.74 | -4.37 |
| NCT of Delhi | -1.97 | 100.00 | -109.00 | 8.64 | 0.00 | 4.31 |
| Odisha | 48.49 | -34.46 | 0.55 | -0.36 | 8.89 | -6.08 |
| Punjab | -21.99 | 5.81 | 36.83 | -17.79 | 31.89 | -15.76 |
| Rajasthan | 39.46 | -5.63 | 9.43 | -5.50 | 34.09 | -12.91 |
| Tamil Nadu | -18.56 | 0.55 | 58.39 | -13.43 | 72.40 | -13.87 |
| Telangana | 39.24 | -28.82 | 30.91 | -18.33 | 33.98 | -25.32 |
| Tripura | 21.43 | -7.27 | -113.91 | 14.28 | -3.49 | 0.70 |
| Uttar Pradesh | 24.26 | -6.86 | 14.19 | -9.08 | 20.81 | -13.04 |
| Uttarakhand | -7.53 | 0.30 | 8.35 | -3.06 | 33.01 | -8.16 |
| West Bengal | 47.87 | -10.91 | 14.30 | -5.37 | 22.69 | -9.17 |
| Note: VPC – variance partitioning coefficient., Full model is adjusted for age, education, wealth quintile, place of residence. | | | | | | | |

| Table S4. Variance explained by the full models at District and PSU levels for the overweight, obesity, and overweight/ obesity use among men (15-49) by states of India, NFHS 2019–21 | | | | | | | |
| --- | --- | --- | --- | --- | --- | --- | --- |
| **States** | **Overweight** | | **Obesity** | | **Overweight/ Obesity** | |
| District | PSU | District | PSU | District | PSU |
| Andhra Pradesh | -150.76 | 47.50 | 0.00 | 0.00 | -96.37 | 11.72 |
| Arunachal Pradesh | -7.34 | 100.00 | 30.52 | -12.53 | 21.34 | -9.75 |
| Assam | -5.43 | 0.77 | -58.13 | 10.92 | -28.56 | 5.98 |
| Bihar | 54.03 | -6.65 | 8.08 | -1.63 | 50.75 | -14.63 |
| Chhattisgarh | 49.93 | -18.15 | 34.30 | -3.70 | 44.83 | -12.67 |
| Gujarat | 79.10 | -14.95 | 21.12 | -7.40 | 25.83 | -8.75 |
| Haryana | 0.00 | 1.22 | -2.49 | 0.74 | 6.25 | -0.78 |
| Himachal Pradesh | 0.00 | 0.00 | -25.17 | 5.92 | 3.89 | -1.13 |
| Jammu & Kashmir | -2775.45 | 0.02 | 39.79 | -10.58 | 51.17 | -7.59 |
| Jharkhand | -39.63 | 23.86 | 17.99 | -3.64 | -21.36 | 7.69 |
| Karnataka | 100.00 | -9.45 | 81.69 | -5.83 | 49.20 | -8.78 |
| Kerala | 17.90 | -5.90 | 95.32 | -1.82 | 100.00 | -80.79 |
| Madhya Pradesh | -9.44 | 3.90 | 29.76 | -6.12 | 12.21 | -2.40 |
| Maharashtra | -8707.83 | 0.00 | 6.70 | -1.13 | 13.59 | -1.18 |
| Manipur | 30.78 | -6.05 | -248.53 | 3.39 | -14.95 | 2.87 |
| Meghalaya | 93.58 | -11.82 | 57.77 | -16.00 | 91.16 | -10.40 |
| Mizoram | -27.96 | 7.86 | 98.59 | 0.00 | -2828.41 | 2.27 |
| Nagaland | -25.78 | 25.76 | 8.65 | -2.73 | 7.39 | -5.39 |
| NCT of Delhi | 100.00 | 0.00 | 100.00 | -23.07 | 36.37 | -9.35 |
| Odisha | 100.00 | -0.52 | 100.00 | -37.78 | 100.00 | -33.64 |
| Punjab | 40.04 | -38.61 | 43.99 | -6.89 | 66.10 | -13.97 |
| Rajasthan | -10.32 | 2.15 | 100.00 | -4.63 | 17.81 | -2.04 |
| Tamil Nadu | 58.04 | -25.57 | 62.65 | -4.08 | 100.00 | -6.64 |
| Telangana | 100.00 | -22.79 | 56.22 | -27.20 | 52.19 | -29.17 |
| Tripura | 0.00 | 0.00 | 13.40 | -5.18 | 22.22 | -3.59 |
| Uttar Pradesh | 67.94 | -8.79 | 27.46 | -7.90 | 39.37 | -9.42 |
| Uttarakhand | 10.49 | -1.31 | 56.97 | -12.54 | 51.09 | -7.28 |
| West Bengal | 3.05 | -0.64 | 9.69 | -1.35 | 40.31 | -7.13 |
| Note: VPC – variance partitioning coefficient., Full model is adjusted for age, education, wealth quintile, place of residence. | | | | | | | |
